# Supplementary material
Source: PubMed Central journal article supplement (PMC3766636)
Supplement: NIHMS477776-supplement-supplement_2.pdf [file NIHMS477776-supplement-supplement_2.pdf]

| Table 1. Demographic information on enrolled male subjects.                                                                           |                        |                                                   |                                             |
|---------------------------------------------------------------------------------------------------------------------------------------|------------------------|---------------------------------------------------|---------------------------------------------|
|                                                                                                                                       | Non-carriers           | Premutation Carriers<br>without motor<br>symptoms | Premutation Carriers<br>with motor symptoms |
| N                                                                                                                                     | 18                     | 23                                                | 66                                          |
| Age                                                                                                                                   | 65.9 ± 9.1             | 63.5 ± 7.3                                        | 66.1 ± 7.5                                  |
| Race/Ethnicity                                                                                                                        |                        |                                                   |                                             |
| Caucasian                                                                                                                             | 100%                   | 100%                                              | 96.8%                                       |
| African-American                                                                                                                      | 0%                     | 0%                                                | 1.6%                                        |
| Hispanic                                                                                                                              | 0%                     | 0%                                                | 1.6%                                        |
| Education<br>(% college completed)                                                                                                    | 55.6%                  | 20.0%                                             | 43.5%                                       |
| Repeat Size<br>Median (Range)                                                                                                         | 31 (20-54)             | 80 (55-150)                                       | 88 (55-180)                                 |
| WAIS-III FSIQ Estimate*                                                                                                               | 114.4 ± 11.9<br>(N=14) | 99.1 ± 13.9<br>(N=16)                             | 100.2 ± 14.5<br>(N=44)                      |
| WAIS-III VIQ Estimate*                                                                                                                | 113.7 ± 14.5<br>(N=14) | 98.2 ± 13.6<br>(N=16)                             | 100.9 ± 13.8<br>(N=47)                      |
| WAIS-III PIQ Estimate*                                                                                                                | 110.0 ± 11.3<br>(N=14) | 97.1 ± 15.3<br>(N=16)                             | 97.6 ± 16.1<br>(N=43)                       |
| * WAIS-III IQ estimates were only available on the subset of subjects eligible for the full neuropsychological battery (see methods). |                        |                                                   |                                             |

| Table 2. Linear regression results using repeat size as a continuous variable. All models were adjusted for age and education. |    |                              |                         |                                        |                                               |
|--------------------------------------------------------------------------------------------------------------------------------|----|------------------------------|-------------------------|----------------------------------------|-----------------------------------------------|
| Outcome                                                                                                                        | N  | Overall Model R <sup>2</sup> | p-value for repeat size | Partial R <sup>2</sup> for repeat size | Standardized beta coefficient for repeat size |
| VIQ (WAIS-III)                                                                                                                 | 73 | 0.32                         | 0.002                   | 0.13                                   | -0.32                                         |
| PIQ (WAIS-III) <sup>a</sup>                                                                                                    | 63 | 0.38                         | 0.004                   | 0.13                                   | -0.31                                         |
| V cognitive decline                                                                                                            | 70 | 0.07                         | 0.015                   | 0.09                                   | 0.29                                          |
| P cognitive decline <sup>a</sup>                                                                                               | 62 | 0.22                         | 0.012                   | 0.11                                   | 0.30                                          |
| Memory Factor 1:<br>Visual Reproduction Memory Factor <sup>a</sup>                                                             | 65 | 0.07                         | 0.201                   | 0.03                                   | -0.16                                         |
| Memory Factor 2:<br>Logical Memory Factor                                                                                      | 70 | 0.10                         | 0.130                   | 0.03                                   | -0.18                                         |
| Memory Factor 3:<br>Word Lists Memory Factor                                                                                   | 70 | <0.01                        | 0.758                   | <0.01                                  | -0.04                                         |
| EF Factor 1:<br>Mental Flexibility Factor                                                                                      | 63 | <0.01                        | 0.224                   | 0.02                                   | -0.16                                         |
| EF Factor 2:<br>Attention and Verbal Fluency Factor <sup>a</sup>                                                               | 59 | 0.13                         | 0.406                   | 0.01                                   | -0.10                                         |
| Behavior Factor 1: Depression and<br>Anxiety Factor                                                                            | 88 | 0.01                         | 0.154                   | 0.02                                   | 0.15                                          |
| Behavior Factor 2:<br>Social Phobia Factor Score                                                                               | 88 | 0.04                         | 0.611                   | <0.01                                  | -0.05                                         |
| <sup>a</sup> grooved pegboard dominant hand time included as a covariate                                                       |    |                              |                         |                                        |                                               |

| Table 3. WAIS-III subscales. Linear regression results using repeat size as a continuous variable. All models were adjusted for age and education. |                                  |    |                              |                         |                                        |                                               |
|----------------------------------------------------------------------------------------------------------------------------------------------------|----------------------------------|----|------------------------------|-------------------------|----------------------------------------|-----------------------------------------------|
| Outcome                                                                                                                                            |                                  | N  | Overall Model R <sup>2</sup> | p-value for repeat size | Partial R <sup>2</sup> for repeat size | Standardized beta coefficient for repeat size |
| Verbal                                                                                                                                             | Similarities                     | 74 | 0.33                         | 0.010                   | 0.09                                   | -0.25                                         |
|                                                                                                                                                    | Arithmetic                       | 73 | 0.15                         | 0.024                   | 0.07                                   | -0.25                                         |
|                                                                                                                                                    | Digit Span                       | 73 | 0.14                         | 0.027                   | 0.07                                   | -0.25                                         |
|                                                                                                                                                    | Information                      | 74 | 0.31                         | 0.016                   | 0.08                                   | -0.24                                         |
|                                                                                                                                                    | Letter Number Sequencing         | 73 | 0.07                         | 0.026                   | 0.07                                   | -0.26                                         |
| Performance                                                                                                                                        | Picture Completion               | 74 | 0.21                         | 0.022                   | 0.07                                   | -0.25                                         |
|                                                                                                                                                    | Digit Symbol-Coding <sup>a</sup> | 65 | 0.36                         | 0.193                   | 0.03                                   | -0.13                                         |
|                                                                                                                                                    | Matrix Reasoning                 | 72 | 0.14                         | 0.031                   | 0.07                                   | -0.24                                         |
|                                                                                                                                                    | Symbol Search <sup>a</sup>       | 65 | 0.32                         | 0.005                   | 0.12                                   | -0.30                                         |

<sup>a</sup> grooved pegboard dominant hand time included as a covariate

| Outcome                                               | Overall model p-value | p-value for repeat size group | Non-carriers (N) | Premutation Carriers without motor symptoms (N) | Premutation Carriers with motor symptoms (N) |
|-------------------------------------------------------|-----------------------|-------------------------------|------------------|-------------------------------------------------|----------------------------------------------|
| VIQ (WAIS-III)                                        | <0.001                | 0.018                         | 112.0 (14)       | 103.1 (15)                                      | 101.1 (44)**                                 |
| PIQ (WAIS-III)                                        | 0.003                 | 0.056                         | 108.5 (14)       | 101.5 (15)                                      | 97.9 (40)**                                  |
| V cognitive decline                                   | 0.399                 | 0.296                         | -4.1 (14)        | -0.6 (15)                                       | 0.8 (41)                                     |
| P cognitive decline                                   | 0.269                 | 0.163                         | 0.9 (14)         | 5.4 (15)                                        | 8.7 (39)                                     |
| Memory Factor 1:<br>Visual Reproduction Memory Factor | 0.998                 | 0.978                         | 0.03 (14)        | -0.05 (15)                                      | -0.02 (41)                                   |
| Memory Factor 2:<br>Logical Memory Factor             | 0.005                 | 0.031                         | 0.58 (14)        | 0.08 (15)                                       | -0.20 (41)**                                 |
| Memory Factor 3:<br>Word Lists Memory Factor          | 0.471                 | 0.577                         | -0.12 (14)       | 0.27 (15)                                       | 0.03 (41)                                    |
| EF Factor 1:<br>Mental Flexibility Factor             | 0.963                 | 0.792                         | 0.06 (14)        | 0.12 (14)                                       | -0.09 (35)                                   |
| EF Factor 2:<br>Attention and Verbal Fluency Factor   | 0.014                 | 0.375                         | 0.31 (14)        | -0.19 (14)                                      | 0.02 (35)                                    |
| Behavior Factor 1:<br>Depression and Anxiety Factor   | 0.298                 | 0.242                         | -0.37 (17)       | 0.09 (19)                                       | 0.10 (52)                                    |
| Behavior Factor 2:<br>Social Phobia Factor Score      | 0.155                 | 0.797                         | 0.16 (17)        | -0.06 (19)                                      | 0.01 (52)                                    |

\*\*indicates significant between group differences compared to non-carriers using Tukey's post hoc analysis.
